# Supplementary material for: Characterizing Recharge in Southern Mali Using a Combination of Modeling and Stable Isotopes
Source: Frontiers journal article supplement (doi:10.3389/frwa.2022.778957), 2022-02-07
Supplement: Table_2.XLSX [file Table_2.XLSX]

## Sheet: Isotope Data
Table S2. Field observations, measurements, and d18O and d2H content of groundwater and surface water samples collected in May of 2008.
Duplicates (D) run during the isotopic analysis are italicized. NA is not available; masl is metres above sea level; mbgs is metres below ground surface
Sample Type	Sample ID	Name		Sample Date	Latitude	Longitude	Elevation (masl)	Water Level (mbgs)	Depth (mbgs)	δ18O (‰)	δ2H (‰)
Surface water	1	Lafiabougou Creek		2021-05-23	11.3	-5.68	370	NA	NA	-2.6	-16.62
	2	Bagoé River		2021-05-25	11.45	-6.58	463	NA	NA	2.08	-0.02
	3	Banifing River		2021-05-25	11.37	-7.31	327	NA	NA	-0.52	-4.04
	4	Baoulé River		2021-05-25	11.4	-7.45	326	NA	NA	2.09	-0.99
	5	Niger River		2021-05-29	12.6	-8.03	320	NA	NA	-0.92	-13.49
Groundwater from Sandstone	6	Lafiabougou		2021-05-23	11.3	-5.68	374	30.56	299	-5.29	-39.83
	6D									-5.29	-39.35
	7	Naflebougou		2021-05-23	11.3	-5.76	374	8.13	72.3	-4.85	-34.38
	8	Bougoulaville		2021-05-24	11.32	-5.68	376	NA	58	-5.06	-38.86
	9	Kouloussandougou		2021-05-24	11.35	-5.66	390	NA	34	-4.19	-29.6
	10	Sirakoro		2021-05-24	11.27	-5.64	390	NA	67	-4.53	-34.03
	11	Yieloronbougou		2021-05-24	11.32	-5.76	379	NA	21	-4.51	-30.68
	12	Ntobougou		2021-05-24	11.35	-5.77	405	NA	137	-5.92	-42.16
	13	Sikasso Medine		2021-05-24	11.32	-5.69	463	NA	81	-4.82	-34.7
	14	Banankoro		2021-05-28	12.5	-7.94	354	7.07	NA	-5.34	-36.38
	15	Gouana		2021-05-28	12.52	-8	356	10.09	175	-6.27	-44.01
	16	Moribabougou		2021-05-29	12.68	-7.83	355	NA	52.8	-6.02	-43.62
	17	Solomanibougou		2021-05-29	12.68	-7.89	320	NA	NA	-6.48	-47.3
	18	Dialakorodji Plateau		2021-05-29	12.69	-7.97	381	NA	NA	-5.57	-36.8
	19	Diallakokodi		2021-05-29	12.69	-7.97	374	NA	NA	-6.2	-43.88
	19D									-6.28	-44.61
	20	Djikoroni-Heremakono		2021-05-29	12.6	-8.01	328	NA	NA	-6.5	-47.93
Groundwater from Birimian	21	N’Tienkoungoba		2021-05-25	11.46	-6.58	463	NA	40.55	-4.57	-33.64
	22	Bablena		2021-05-25	11.4	-6.96	363	NA	NA	-5.11	-34.34
	23	Tonfa		2021-05-25	11.41	-7.12	350	NA	36.3	-5.23	-36.5
	24		Zanitiebougou Maternité	2021-05-25	11.38	-7.25	348	NA	NA	-5.25	-37.82
	25	Dalabani		2021-05-25	11.39	-7.46	341	NA	57.63	-5.4	-40.18
	26	Ssheb Bougouni		2021-05-25	11.41	-7.49	353	NA	55.74	-4.46	-29.86
	26D									-4.5	-30.4
	27	Sido		2021-05-25	11.67	-7.6	377	NA	63.58	-5.66	-42.51
	28	Famana		2021-05-25	11.87	-7.83	356	NA	75.62	-5.76	-43.06
