# Supplementary material for: Characterizing Recharge in Southern Mali Using a Combination of Modeling and Stable Isotopes
Source: Frontiers journal article supplement (doi:10.3389/frwa.2022.778957), 2022-02-07
Supplement: Table_3.XLSX [file Table_3.XLSX]

## Sheet: Water balance results
Supplementary Table 3. Annual components of the water balance for each unsaturated zone group at three depth intervals for 30 years of simulated data. AET is actual evapotranspiration; R is recharge; S is moisture storage in the column.
Group							5 m Depth			7.5 m Depth			10 m Depth
	Value	Rainfall (mm)	Runoff (mm)	Runoff (%)	AET (mm)	AET (%)	R	R	S	R	R	S	R	R	S
							(mm)	(%)	(m)	(mm)	(%)	(m)	(mm)	(%)	(m)
1	Average	1027	0	0	465.2	45.8	551.5	53.2	1.66	553.2	53.4	2.63	555.1	53.7	3.62
	Minimum	711.9	0	0	337.8	35.8	356.6	39.9	1.66	347.7	41.2	2.6	363.4	42.6	3.58
	Maximum	1417.7	0	0	631.7	58.8	868.4	62.8	1.68	866.4	64.2	2.66	860.8	64.8	3.65
	Median	1040.7	0	0	474.6	46.8	542	53.4	1.66	550.5	52.3	2.63	547.5	52.3	3.62
	St. Dev.	178.7	0	0	68.2	5.8	136.3	5.8	0	136.6	6.2	0.01	133.5	5.9	0.02
2	Average	1027	6.3	0.6	533.5	52.7	477.7	45.9	1.84	480	46.1	2.8	481.5	46.4	3.79
	Minimum	711.9	0	0	400.7	41.3	276.6	32.4	1.83	291	34.6	2.78	304	36.2	3.75
	Maximum	1417.7	70.8	6.7	723.3	66.5	791.8	56.3	1.85	788.8	57.2	2.83	782.4	57.6	3.83
	Median	1040.7	1	0.1	541.8	53.9	454.7	44.7	1.83	474.6	45.5	2.81	475.4	45.8	3.79
	St. Dev.	178.7	14.9	1.4	72	6.8	134.9	6.6	0.01	133.4	6.5	0.01	128.8	6.1	0.02
3	Average	1027	0	0	465.2	45.8	557.2	53.8	1.08	558.1	53.9	1.69	560.1	54.1	2.3
	Minimum	711.9	0	0	337.8	35.8	355	40.1	1.07	349	40.5	1.66	350	41.2	2.27
	Maximum	1417.7	0	0	631.7	58.8	879.9	64.2	1.1	876.7	64.6	1.71	877.9	64.3	2.32
	Median	1040.7	0	0	474.6	46.8	542.7	53.6	1.08	546.8	52.9	1.69	551.7	52.7	2.3
	St. Dev.	178.7	0	0	68.2	5.8	137.8	6.1	0.01	138.1	6.3	0.01	137.5	6.2	0.01
4	Average	1027	6.3	0.6	533.5	52.7	483	46.4	1.26	484.3	46.6	1.86	486.2	46.7	2.47
	Minimum	711.9	0	0	400.7	41.3	281	32.8	1.24	283.5	33.5	1.83	290.2	34.3	2.44
	Maximum	1417.7	70.8	6.7	723.3	66.5	801.1	57	1.28	796.8	57.3	1.89	799.1	57.6	2.5
	Median	1040.7	1	0.1	541.8	53.9	459.2	45.7	1.26	469.5	45.6	1.86	472.7	45.8	2.47
	St. Dev.	178.7	14.9	1.4	72	6.8	136	6.7	0.01	135.3	6.7	0.01	134.9	6.6	0.01
