# Supplementary material for: Characterizing Recharge in Southern Mali Using a Combination of Modeling and Stable Isotopes
Source: Frontiers journal article supplement (doi:10.3389/frwa.2022.778957), 2022-02-07
Supplement: Table_4.XLSX [file Table_4.XLSX]

## Sheet: Water balance_sensitivity
Supplementary Table 4. Annual water balance results for evapotranspiration sensitivity analysis for Groups 1 and 2 at 7.5 m depth.
Group	AET Level	Value	Rainfall (mm)	ET (mm)	ET (%)	Recharge (mm)	Recharge (%)	Runoff (mm)	Runoff (%)
1	Base Model	Average	1027	465.2	45.8	562.4	54.3	0	0
		Minimum	711.9	337.8	35.8	360.2	41.8	0	0
		Maximum	1417.7	631.7	58.8	879.3	64.7	0	0
		Median	1040.7	474.6	46.8	555.8	53.2	0	0
		St. Dev.	178.7	68.2	5.8	136.7	5.9	0	0
	Low	Average	1027	457.4	45.1	570.2	55.1	0	0
		Minimum	711.9	331.5	35	368.2	42.7	0	0
		Maximum	1417.7	617.8	57.7	893.2	65.3	0	0
		Median	1040.7	468	46.1	563.3	54.3	0	0
		St. Dev.	178.7	66.3	5.7	137.6	5.9	0	0
	Moderate	Average	1027	559.2	55.3	468.8	44.9	0	0
		Minimum	711.9	427.7	42.7	269	32	0	0
		Maximum	1417.7	742.1	69.3	798.7	56.3	0	0
		Median	1040.7	565.2	56	455.3	44.2	0	0
		St. Dev.	178.7	69	7	140	6.9	0	0
	High	Average	1027	572	56.6	456.1	43.5	0	0
		Minimum	711.9	446.2	43	255.6	30.6	0	0
		Maximum	1417.7	762.5	71.1	795.3	56.1	0	0
		Median	1040.7	575.9	57.7	447.6	43	0	0
		St. Dev.	178.7	69.1	7.8	145.9	7.6	0	0
2	Base Model	Average	1027	533.5	52.7	488.2	46.9	6.3	0.6
		Minimum	711.9	400.7	41.3	295.5	34.9	0	0
		Maximum	1417.7	723.3	66.5	801.4	57.6	70.8	6.7
		Median	1040.7	541.8	53.9	474.6	45.8	1	0.1
		St. Dev.	178.7	72	6.8	133.9	6.4	14.9	1.4
	Low	Average	1027	532.9	52.6	491.1	47.2	4	0.4
		Minimum	711.9	398.5	41.2	288.8	34.5	0	0
		Maximum	1417.7	721.6	66.5	807.3	58.2	69.8	6.6
		Median	1040.7	541.4	53.6	477.2	46.1	0	0
		St. Dev.	178.7	71.8	6.9	137.8	6.7	14	1.3
	Moderate	Average	1027	570.3	56.4	458.1	43.8	0	0
		Minimum	711.9	441.8	43.4	269.9	31.1	0	0
		Maximum	1417.7	761.7	69.8	787.9	55.6	0	0
		Median	1040.7	580.4	57.5	452.6	43.5	0	0
		St. Dev.	178.7	70.7	7.4	140.6	7	0	0
	High	Average	1027	583.5	57.8	444.5	42.3	0	0
		Minimum	711.9	453.5	43.6	235.5	28.7	0	0
		Maximum	1417.7	777.2	71.7	793.4	56	0	0
		Median	1040.7	593.7	58.1	437.3	42.7	0	0
		St. Dev.	178.7	68.5	7.9	145.8	7.6	0	0
