# Supplementary material for: Characterizing Recharge in Southern Mali Using a Combination of Modeling and Stable Isotopes
Source: Frontiers journal article supplement (doi:10.3389/frwa.2022.778957), 2022-02-07
Supplement: Table_5.XLSX [file Table_5.XLSX]

## Sheet: Water balance_sensitivity
Supplementary Table 5. Annual water balance under variable slope conditions for Groups 1 and 2 at 7.5 m depth.
Group	ET Level	Value	Rainfall (mm)	ET (mm)	ET (%)	Recharge (mm)	Recharge (%)	Runoff (mm)	Runoff (%)
1	Base Model	Average	1027	465.2	45.8	562.4	54.3	0	0
		Minimum	711.9	337.8	35.8	360.2	41.8	0	0
		Maximum	1417.7	631.7	58.8	879.3	64.7	0	0
		Median	1040.7	474.6	46.8	555.8	53.2	0	0
		St. Dev.	178.7	68.2	5.8	136.7	5.9	0	0
	Flat	Average	1027	468.6	46.2	477.6	46.4	81.5	7.5
		Minimum	711.9	340.3	36.2	328.9	39.6	16.7	1.8
		Maximum	1417.7	641.1	59.2	643.1	58.1	235.1	16.6
		Median	1040.7	475.3	47.4	463.6	45	68.5	6.8
		St. Dev.	178.7	68.5	5.8	96.5	4.5	48.2	3.3
	Rolling	Average	1027	468.8	46.2	472	45.9	86.8	8
		Minimum	711.9	345.9	36.4	326.5	39.2	19.1	2.1
		Maximum	1417.7	640.6	59.2	633.2	57.1	245.4	17.3
		Median	1040.7	476.5	47.1	457.6	44.6	73.6	7.3
		St. Dev.	178.7	68.1	5.8	95.3	4.5	49.9	3.4
2	Base Model	Average	1027	533.5	52.7	488.2	46.9	6.3	0.6
		Minimum	711.9	400.7	41.3	295.5	34.9	0	0
		Maximum	1417.7	723.3	66.5	801.4	57.6	70.8	6.7
		Median	1040.7	541.8	53.9	474.6	45.8	1	0.1
		St. Dev.	178.7	72	6.8	133.9	6.4	14.9	1.4
	Flat	Average	1027	512.9	50.6	176.2	17.2	339.1	32.4
		Minimum	711.9	381.1	40.5	107.9	12.8	196.1	21.1
		Maximum	1417.7	701.2	62.5	247.8	24.6	640.5	45.2
		Median	1040.7	526	51.5	174.6	17	313.8	31.8
		St. Dev.	178.7	70.7	6.2	38.3	2.6	103.6	4.8
	Rolling	Average	1027	511.6	50.5	169.3	16.5	347	33.2
		Minimum	711.9	380	40.4	102.4	11.7	200	21.7
		Maximum	1417.7	699.8	62.1	237.7	23.9	647.9	45.7
		Median	1040.7	524.8	51.2	163.4	16.3	321.6	32.8
		St. Dev.	178.7	69.8	6.2	39.7	2.7	104.7	4.8
